# Supplementary material for: Utilizing the aggregation-induced emission phenomenon to visualize spontaneous molecular directed motion in the solid state
Source: Royal Society of Chemistry journal article supplement (doi:10.1039/c9qm00586b), 2019-01-01
Supplement: c9qm00586b1.pdf [file c9qm00586b1.pdf]

1

## Supporting Information

### 2 Utilizing aggregation-induced emission phenomenon to visualize 3 spontaneous molecular directed motion in solid state

4

5 Jianxun Liu,<sup>‡a</sup> Chang Xing,<sup>‡a</sup> Donghui Wei,<sup>a</sup> Qianqian Deng,<sup>a</sup> Cuiping Yang,<sup>a</sup> Qiuchen Peng,<sup>a,b</sup>

6 Hongwei Hou,<sup>\*a</sup> Yuanyuan Li,<sup>b</sup> and Kai Li<sup>\*a</sup>

7 <sup>a</sup>College of Chemistry and Molecular Engineering, Zhengzhou University, Henan 450001, P. R.  
8 China.

9 <sup>b</sup>College of Chemistry, Chemical and Environmental Engineering, Henan University of  
10 Technology, Henan 450001, P. R. China.

11 <sup>‡</sup>J. Liu, C. Xing contributed equally to this work.

12

#### 13 Contents:

|    |                                                                |           |
|----|----------------------------------------------------------------|-----------|
| 14 | <b>1. Materials.....</b>                                       | <b>S2</b> |
| 15 | <b>2. Characterization.....</b>                                | <b>S2</b> |
| 16 | <b>3. Synthesis.....</b>                                       | <b>S3</b> |
| 17 | <b>4. Test method of the fluorescence in solid state.....</b>  | <b>S4</b> |
| 18 | <b>5. Computational Methods.....</b>                           | <b>S4</b> |
| 19 | <b>6. Caption of video.....</b>                                | <b>S5</b> |
| 20 | <b>7. Selected spectra and data referred in the paper.....</b> | <b>S5</b> |

21

---

## 22 1. Materials

23 Unless otherwise noted, all chemical reagents and solvents were commercially available and  
24 were used without further purification. Salicylaldehyde and *p*-phenetidine were purchased from  
25 Energy Chemical Co., Shanghai, China. *p*-propoxyaniline were purchased from Alfa Aesar (China)  
26 Chemical Co., Ltd. *p*-butoxyaniline were purchased from Tokyo Chemical Industry Co., Ltd. All  
27 the other reagents and solvents were purchased from Sinopharm Chemical Reagent Beijing Co.,  
28 Beijing, China. Deionized water was used throughout all experiments.

29

## 30 2. Characterization

31 Absorption spectra were recorded by using a JASCO-750 UV-vis spectrometer. Fluorescence  
32 spectra were obtained by using a JASCO FP-8300 spectrometer. The temperatures in fluorescence  
33 measurements were controlled by an ETC-815 peltier thermostatted single cell holder, which  
34 offered a temperature control accuracy of  $\pm 0.1^\circ\text{C}$ . Dynamic light scattering (DLS) experiments  
35 were measured on a NanoPlus-3 DLS particle size/zeta potential analyzer. Powder X-ray  
36 diffraction (PXRD) patterns were recorded with a Bruker D8 ADVANCE. The crystallographic  
37 data were collected on a Rigaku Saturn 724 CCD diffractometer with graphite monochromated  
38 Mo K $\alpha$  radiation ( $\lambda=0.71073\text{\AA}$ ).  $^1\text{H}$  and  $^{13}\text{C}$  nuclear magnetic resonance (NMR) spectra were  
39 recorded on a Bruker AV400 NMR spectrometer operated at 400 MHz and 101 MHz in  $\text{CDCl}_3$ ,  
40 respectively. Atomic force microscopy (AFM) patterns were obtained by Oxford Instruments  
41 MFP-3D Infinity atomic force microscope. Melting point were tested on a XT4A melting point  
42 meter (Temperature control type). Electrospray Ionization Mass Spectrometry (ESI-MS) were  
43 undertaken using an Agilent Technologies 6420 triple quadrupole LC/MS without using the liquid  
44 chromatography part. The photos and videos were taken by a Nikon D5500 camera. Unless  
45 otherwise noted, all the measurement experiments were performed at  $25^\circ\text{C}$ .

### 46 3. Synthesis

47 General synthetic procedures of **SEA**, **SPA** and **SBA** are as follows. 10 mmol salicylaldehyde  
48 was dissolved in 20 mL absolute ethanol. Then 10 mmol corresponding aniline derivative was  
49 added. The mixture was stirred and heated to 80 °C for 30 min. After cooling to room temperature,  
50 light yellow precipitate was formed. The resulting precipitate was filtrated and washed with 10 mL  
51 of cold absolute ethanol for three times. After being dried under reduced pressure, final product  
52 was obtained. The crystal of **SEA**, **SPA** and **SBA** are obtained in *n*-hexane by slowly volatilized at  
53 room temperature.

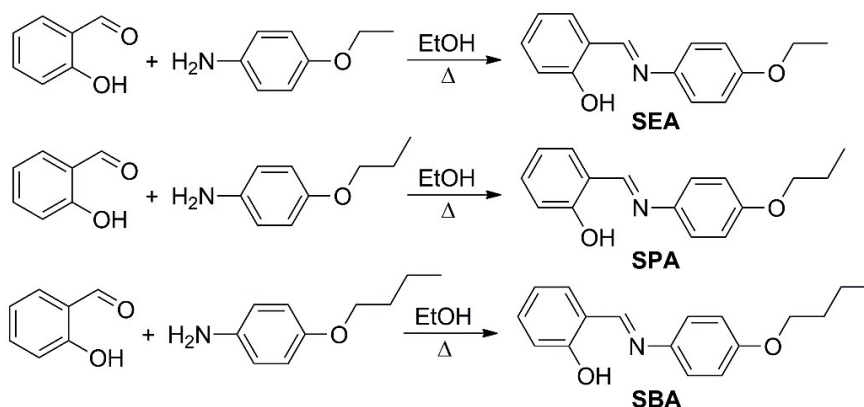

54

55

**Scheme S1.** Synthetic route for **SEA**, **SPA** and **SBA**.

56 **Salicylaldehyde 4-ethoxyaniline Schiff base (SEA)**: Schistose yellow crystalline, yield is  
57 75%. <sup>1</sup>H NMR (CDCl<sub>3</sub>) δ (ppm): 1.43 (t, 3H, *J* = 7.0 Hz), 4.06 (q, 2H, *J* = 7.0 Hz), 6.93 (t, 3H, *J* =  
58 7.6 Hz), 7.02 (d, 1H, *J* = 8.2 Hz), 7.27 (d, 2H, *J* = 8.9 Hz), 7.36 (dd, 2H, *J* = 10.7, 7.9 Hz), 8.61 (s,  
59 1H), 13.44 (s, 1H). <sup>13</sup>C NMR (CDCl<sub>3</sub>) δ (ppm): 14.85, 63.78, 115.17, 117.17, 118.99, 119.43,  
60 122.30, 131.95, 132.66, 141.22, 158.25, 160.33, 161.01. ESI-MS spectrometry: *m/z* calcd for [M +  
61 H]<sup>+</sup> : 242.11; found: 242.10. Melting point: 97 °C.

62 **Salicylaldehyde 4-propoxyaniline Schiff base (SPA)**: Schistose yellow crystalline, yield is  
63 70%. <sup>1</sup>H NMR (CDCl<sub>3</sub>) δ(ppm): 1.05 (t, 3H, *J* = 7.4 Hz), 1.78-1.88 (m, 2H), 3.95 (t, 2H, *J* = 6.6  
64 Hz), 6.93 (t, 3H, *J* = 8.7 Hz), 7.03 (d, 1H, *J* = 8.2 Hz), 7.27 (d, 2H, *J* = 9.0 Hz), 7.36 (dd, 2H, *J*  
65 =11.9, 7.5 Hz), 8.61 (s, 1H), 13.45 (s, 1H). <sup>13</sup>C NMR (CDCl<sub>3</sub>) δ (ppm): 10.54, 22.60, 69.85,  
66 115.20, 117.17, 118.99, 119.42, 122.28, 131.94, 132.65, 141.15, 158.47, 160.28, 161.01. ESI-MS  
67 spectrometry: *m/z* calcd for [M + H]<sup>+</sup> : 256.13; found: 256.10. Melting point: 78 °C.

68 **Salicylaldehyde 4-butoxyaniline Schiff base (SBA)**: Schistose crystalline, yield is 72%. <sup>1</sup>H  
69 NMR (CDCl<sub>3</sub>) δ (ppm): 0.99 (t, 3H, *J* = 7.4 Hz), 1.45-1.556 (m, 3H), 1.74-1.83 (m, 2H), 3.99 (t,

70 2H,  $J = 1.0$  Hz), 6.93 (t, 3H,  $J = 8.2$  Hz), 7.02 (d, 1H,  $J = 8.0$  Hz), 7.27 (d, 2H,  $J = 9.0$  Hz), 7.36  
71 (dd, 2H,  $J = 12.0, 7.5$  Hz), 8.61 (s, 1H), 13.46 (s, 1H).  $^{13}\text{C}$  NMR ( $\text{CDCl}_3$ )  $\delta$  (ppm): 13.86, 19.24,  
72 31.30, 68.03, 115.19, 117.18, 119.00, 119.32, 122.25, 131.97, 132.75, 140.93, 158.50, 160.23,  
73 161.03. ESI-MS spectrometry:  $m/z$  calcd for  $[\text{M} + \text{H}]^+$  : 270.14; found: 270.10. Melting point: 74  
74 °C.

75

#### 76 4. Test method of the fluorescence in solid state

77 A special sample cell was used (Figure S1), which was composed of a quartz glass cuvette and  
78 a glass sheet. As shown in Figure S1, the samples are covered on the glass sheet and ground. Then  
79 the glass sheet with the ground samples are quickly transferred to a quartz glass cuvette, which  
80 was placed in a temperature control device of the fluorescence spectrophotometer to adjust the  
81 temperature to the desired temperature. Then the spectra were recorded.

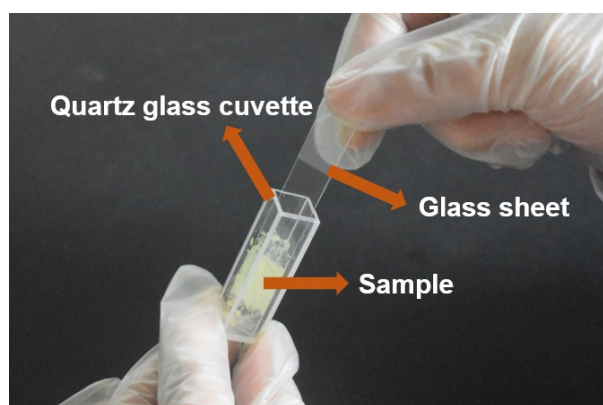

82

83 **Figure S1.** A photo of the special sample cell for fluorescence measurements.

84

#### 85 5. Computational Methods

86 The DFT calculations were performed using the Gaussian 09 program.<sup>[1]</sup> The geometries were  
87 fully optimized using m062x method.<sup>[2, 3]</sup> Basis set 6-31+G(d, p) was employed for all atoms.  
88 Frequency calculations at the same level of theory were carried out to identify all of the stationary  
89 points as minima that have zero imaginary frequency.

#### 90 Reference:

91 [1] M. J. Frisch, G. W. Trucks, H. B. Schlegel, et. al. Gaussian09, Revision C.01, **2010**.

92 [2] Y. Zhao and D. G. Truhlar, *Theor. Chem. Acc.*, **2008**, *120*, 215-241.

93 [3] Y. Zhao and D. G. Truhlar, *Acc. Chem. Res.*, **2008**, *41*, 157-167.

94 **6. Caption of video**

95 **Video 1.** SBA was ground and kept in 25 °C. The video was taken under the irradiation of 365 nm

96 UV light.

97

98 **7. Selected spectra and data referred in the paper**

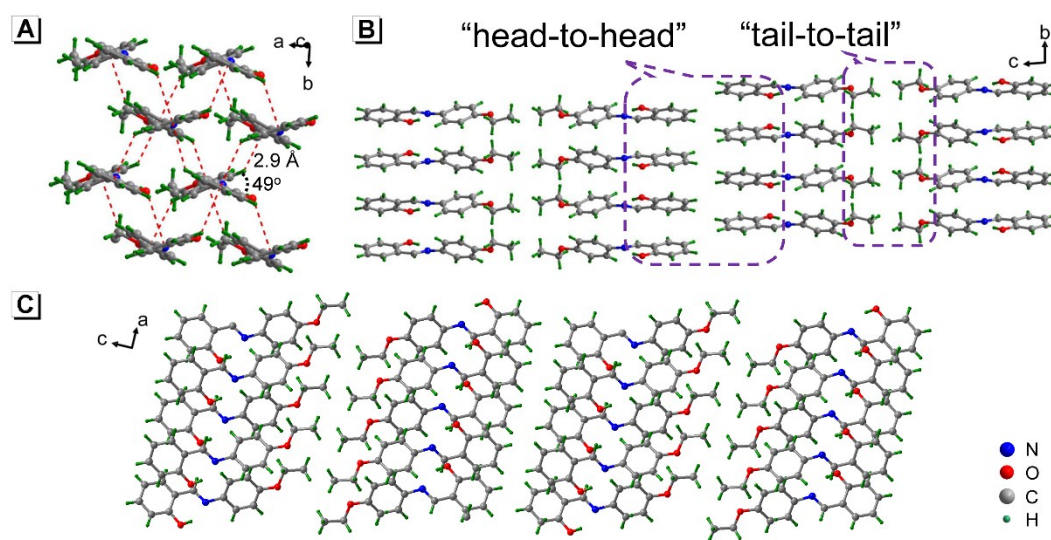

99

100 **Figure S2.** Crystal structure of SEA viewed from different directions.

101

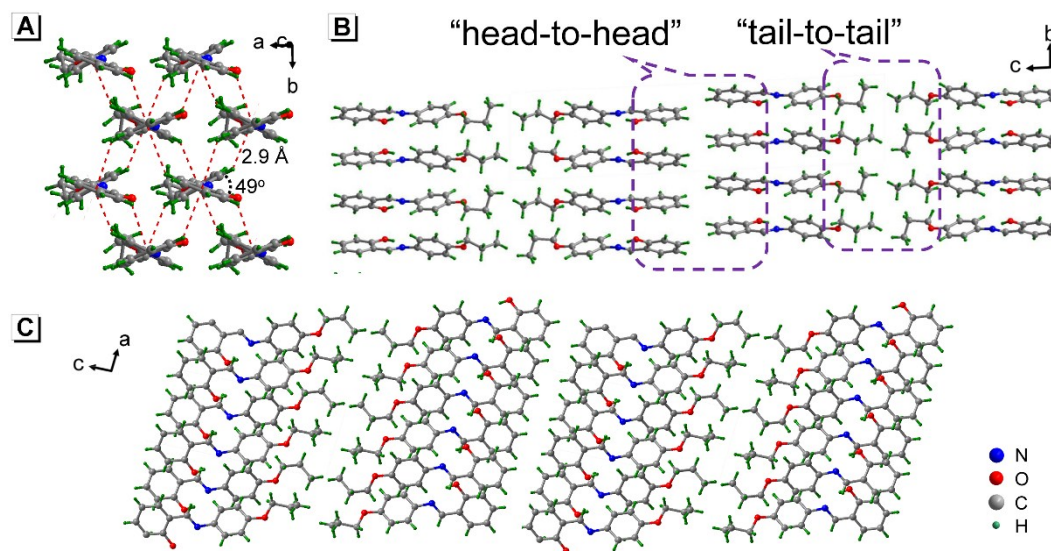

102

103 **Figure S3.** Crystal structure of SPA viewed from different directions.

104

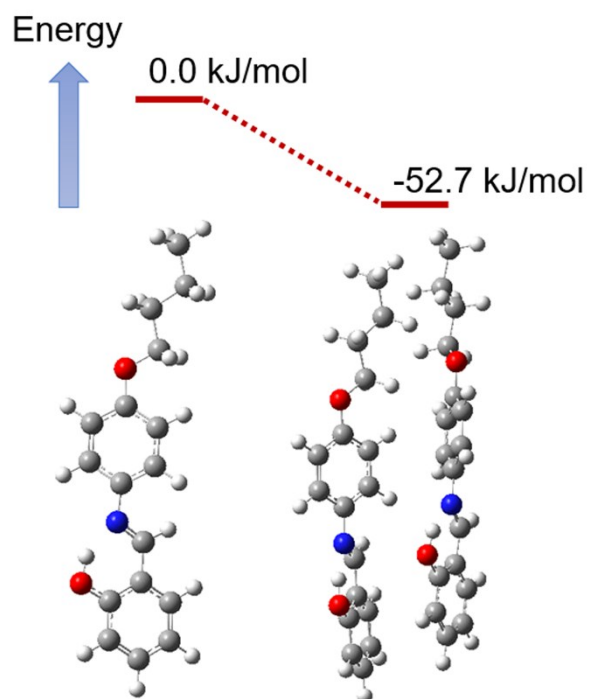

105

106 **Figure S4.** The calculate binding energy of SBA.

107

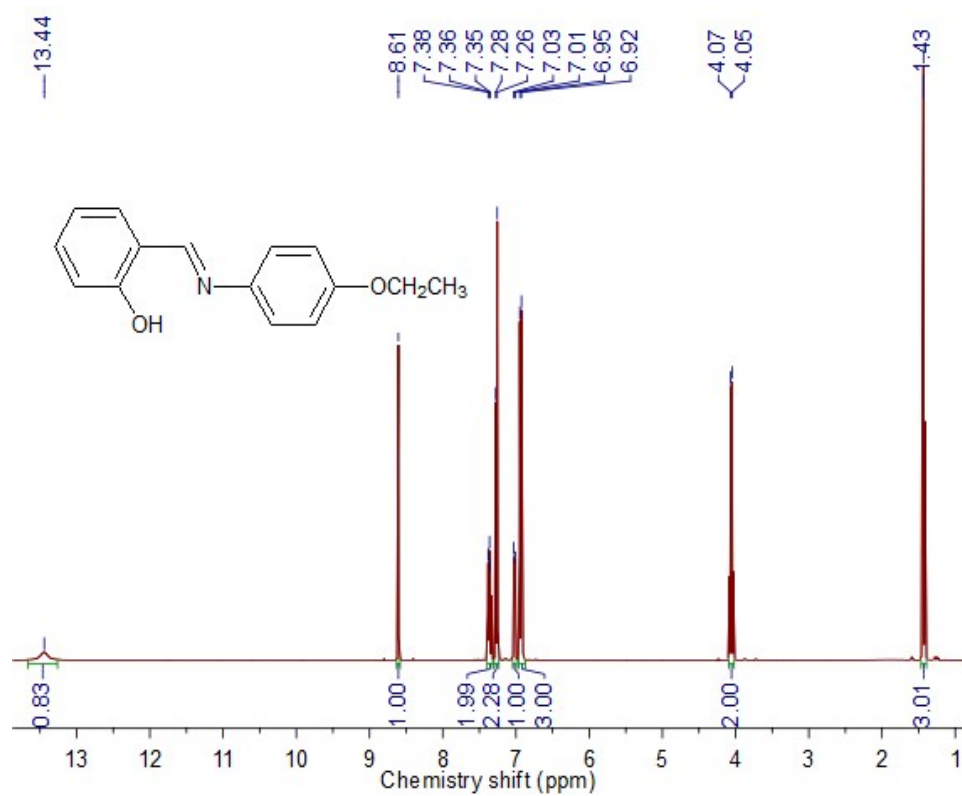

108

109 **Figure S5.** The <sup>1</sup>H NMR spectrum of SEA.

110

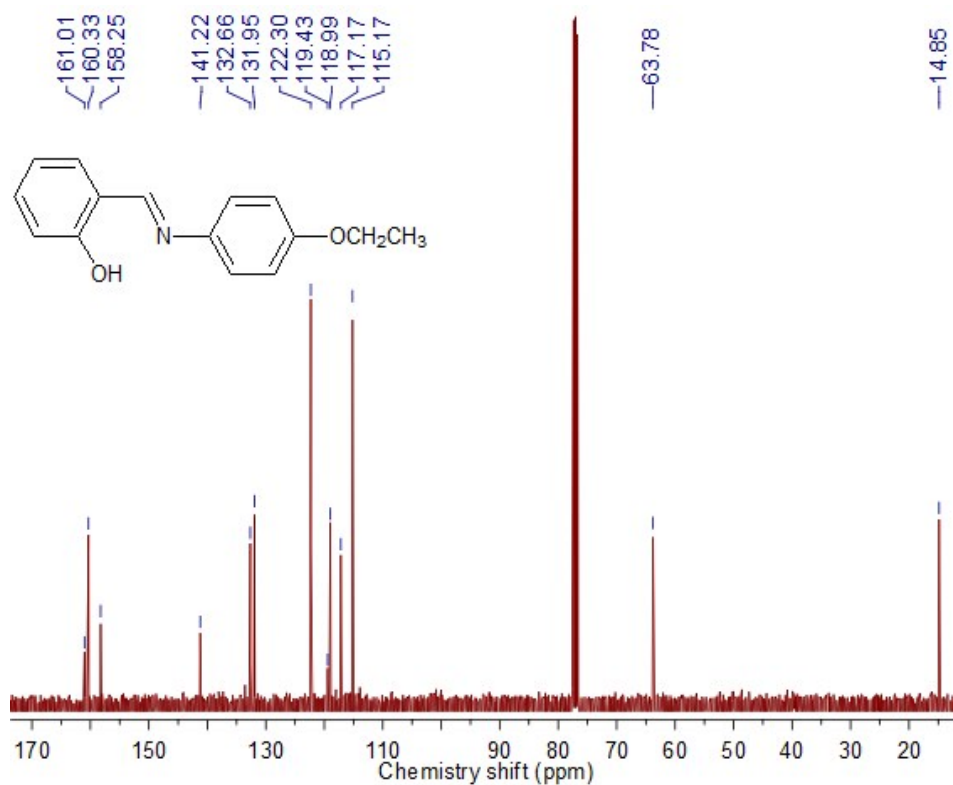

111

112 **Figure S6.** The <sup>13</sup>C NMR spectrum of SEA.

113

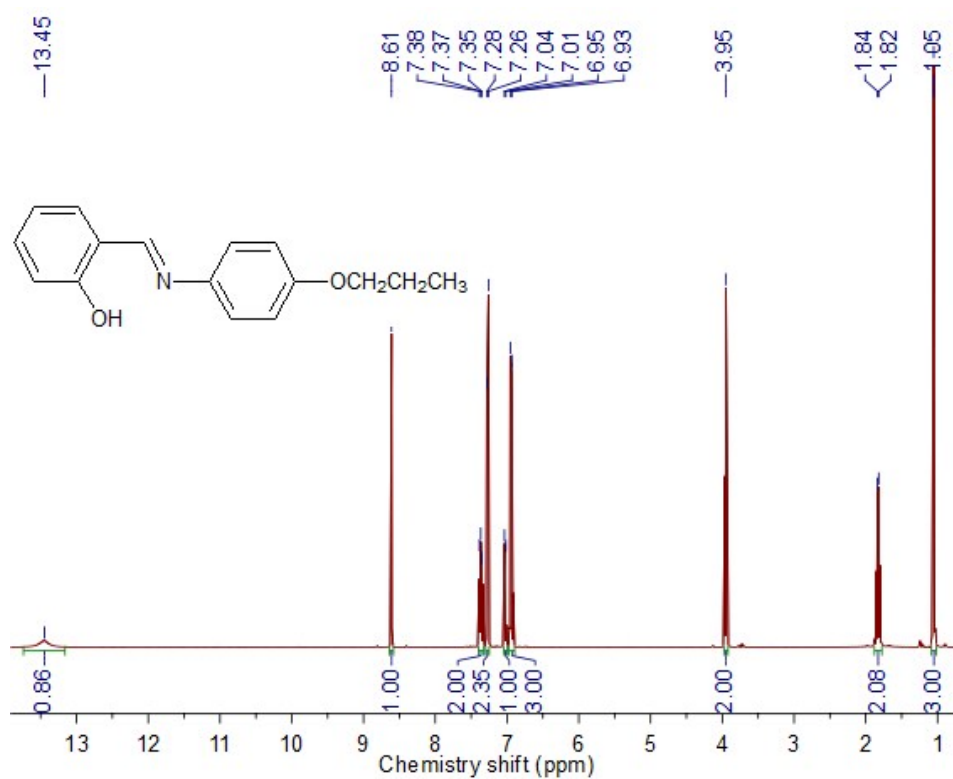

114

115 **Figure S7.** The <sup>1</sup>H NMR spectrum of SPA.

116



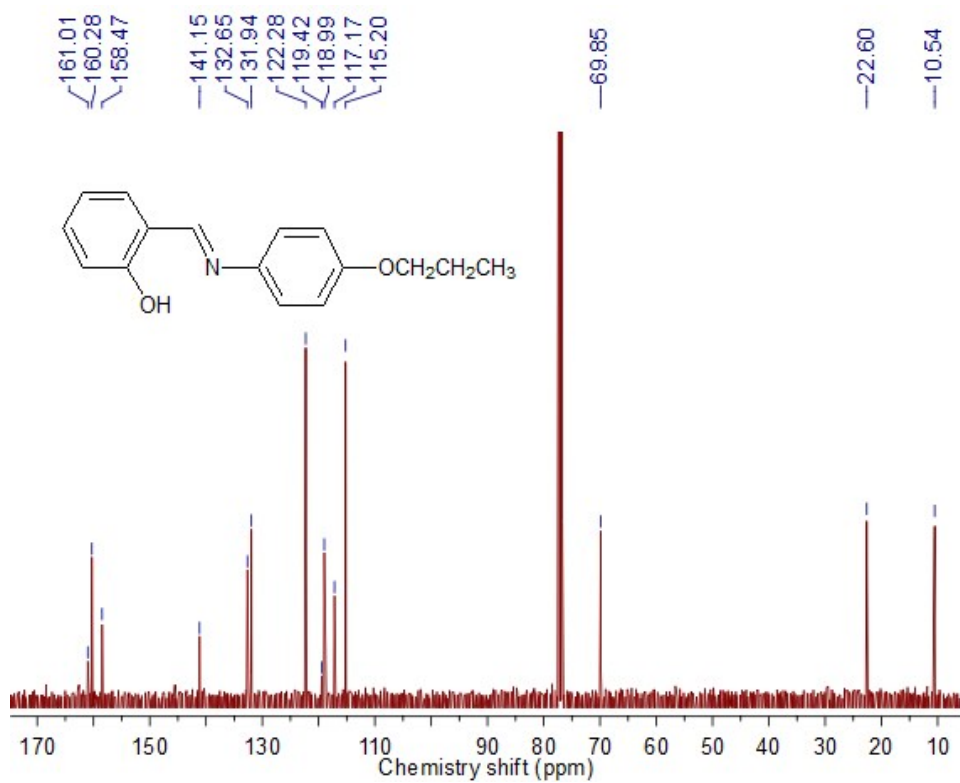

117

118 **Figure S8.** The <sup>13</sup>C NMR spectrum of SPA.

119

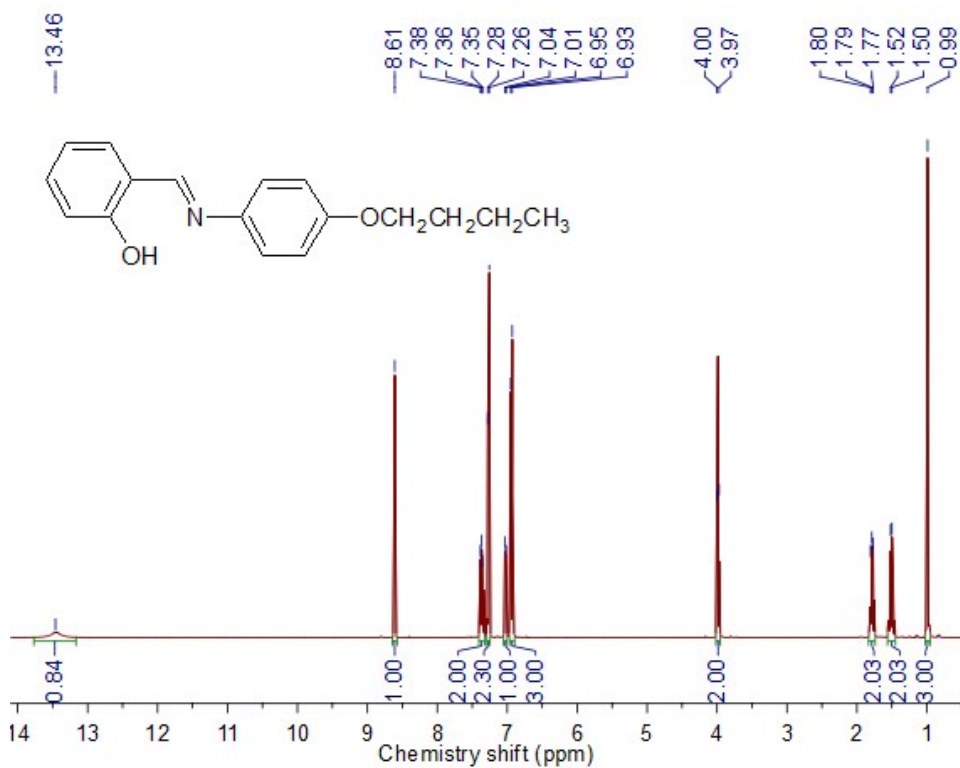

120

121 **Figure S9.** The <sup>1</sup>H NMR spectrum of SBA.

122



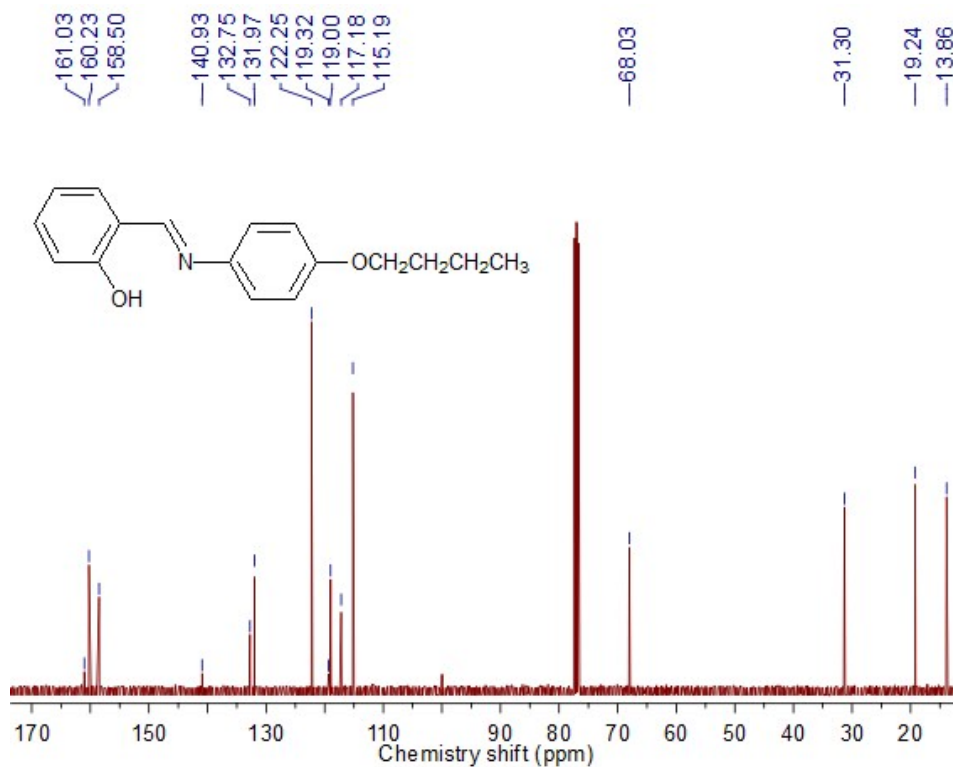

123

124 **Figure S10.** The <sup>13</sup>C NMR spectrum of SBA.

125

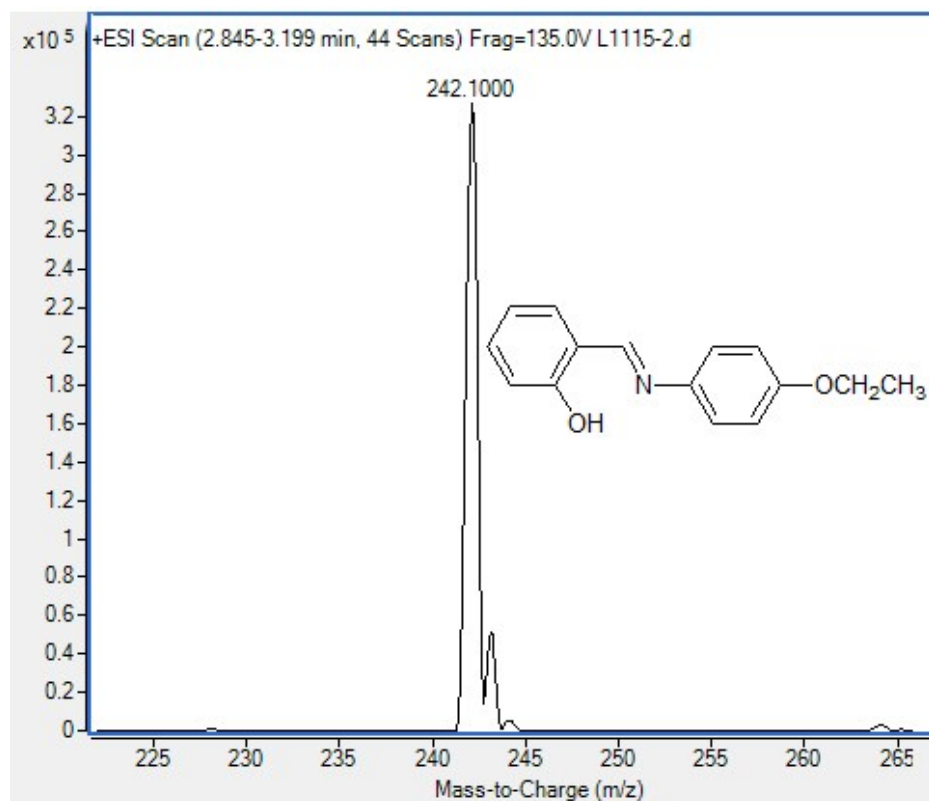

126

127 **Figure S11.** The mass spectrometry of SEA.

128

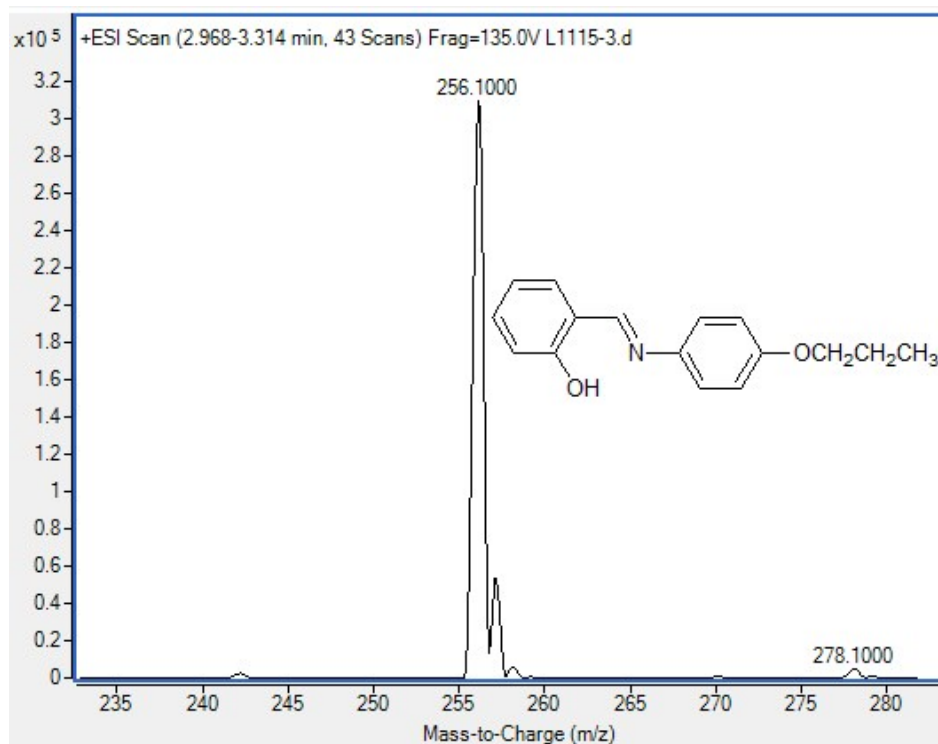

129

130 **Figure S12.** The mass spectrometry of SPA.

131

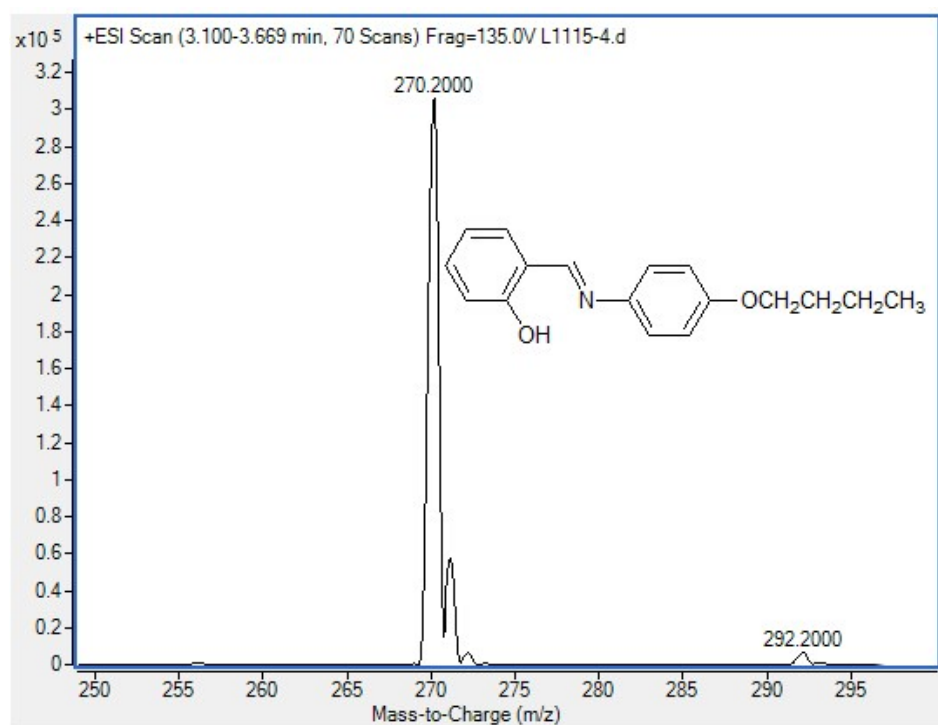

132

133 **Figure S13.** The mass spectrometry of SBA.

134

135 **Table S1.** The calculated  $k$  and  $t_{1/2}$  from 15 °C to 20 °C.

| Temperature(°C)                  | 15   | 16   | 17   | 18    | 19    | 20    |
|----------------------------------|------|------|------|-------|-------|-------|
| $k$ ( $10^{-4} \text{ s}^{-1}$ ) | 5.12 | 7.07 | 8.64 | 13.33 | 15.82 | 23.75 |
| $t_{1/2}$ (s)                    | 1353 | 979  | 802  | 520   | 438   | 292   |

136

137 **Table S2.** Crystallographic data and structure refinement details for **SEA**.

| Complex                       | SEA                                     |
|-------------------------------|-----------------------------------------|
| Formula                       | $\text{C}_{15}\text{H}_{15}\text{NO}_2$ |
| CCDC                          | 1941969                                 |
| $F_w$                         | 241.28                                  |
| Temp.(K)                      | 273.15                                  |
| Wavelength(Å)                 | 0.71073                                 |
| Crystal system                | Triclinic                               |
| Space group                   | $P-1$                                   |
| a(Å)                          | 6.2682(5)                               |
| b(Å)                          | 7.1504(5)                               |
| c(Å)                          | 28.857(2)                               |
| $\alpha$ (°)                  | 94.165(2)                               |
| $\beta$ (°)                   | 90.331(3)                               |
| $\gamma$ (°)                  | 90.002(3)                               |
| $V$ (Å <sup>3</sup> )         | 1289.92(17)                             |
| Z                             | 4                                       |
| Dc(g·cm <sup>-3</sup> )       | 1.242                                   |
| $\mu$ (mm <sup>-1</sup> )     | 0.083                                   |
| $F(000)$                      | 512.0                                   |
| GOF on $F^2$                  | 1.040                                   |
| $R_1^a$ ( $I > 2\sigma(I)$ )  | 0.0591                                  |
| $wR_2^b$ ( $I > 2\sigma(I)$ ) | 0.1616                                  |

138  $^a R_1 = \sum ||F_o| - |F_c|| / \sum |F_o|$ .  $^b wR_2 = \{ \sum [w(F_o^2 - F_c^2)^2] / \sum [w(F_o^2)^2] \}^{1/2}$ .

139 **Table S3.** Crystallographic data and structure refinement details for **SPA**.

| Complex                  | SPA                                             |
|--------------------------|-------------------------------------------------|
| Formula                  | C <sub>16</sub> H <sub>17</sub> NO <sub>2</sub> |
| CCDC                     | 1941970                                         |
| $F_w$                    | 255.30                                          |
| Temp.(K)                 | 293(2)                                          |
| Wavelength(Å)            | 1.54184                                         |
| Crystal system           | Triclinic                                       |
| Space group              | <i>P</i> -1                                     |
| a(Å)                     | 6.2328(2)                                       |
| b(Å)                     | 7.21290(10)                                     |
| c(Å)                     | 31.0245(7)                                      |
| α(°)                     | 92.777(2)                                       |
| β(°)                     | 94.558(2)                                       |
| γ(°)                     | 90.014(2)                                       |
| $V(\text{Å}^3)$          | 1388.70(6)                                      |
| Z                        | 4                                               |
| Dc(g·cm <sup>-3</sup> )  | 1.221                                           |
| μ(mm <sup>-1</sup> )     | 0.642                                           |
| $F(000)$                 | 544                                             |
| GOF on $F^2$             | 1.000                                           |
| $R_1^a[I > 2\sigma(I)]$  | 0.0468                                          |
| $wR_2^b[I > 2\sigma(I)]$ | 0.1319                                          |

140  $^a R_1 = \sum ||F_o| - |F_c|| / \sum |F_o|$ .  $^b wR_2 = \{ \sum [w(F_o^2 - F_c^2)^2] / \sum [w(F_o^2)^2] \}^{1/2}$ .

141

142 **Table S4.** Crystallographic data and structure refinement details for **SBA**.

| Complex                       | SBA                                             |
|-------------------------------|-------------------------------------------------|
| Formula                       | C <sub>17</sub> H <sub>19</sub> NO <sub>2</sub> |
| CCDC                          | 1941971                                         |
| $F_w$                         | 269.33                                          |
| Temp.(K)                      | 100 K                                           |
| Wavelength(Å)                 | 1.54184                                         |
| Crystal system                | Triclinic                                       |
| Space group                   | <i>P</i> -1                                     |
| a(Å)                          | 6.1745(2)                                       |
| b(Å)                          | 7.0411(2)                                       |
| c(Å)                          | 33.2296(10)                                     |
| $\alpha$ (°)                  | 86.545(2)                                       |
| $\beta$ (°)                   | 84.929(2)                                       |
| $\gamma$ (°)                  | 89.992(2)                                       |
| $V$ (Å <sup>3</sup> )         | 1436.38(8)                                      |
| Z                             | 4                                               |
| Dc(g·cm <sup>-3</sup> )       | 1.245                                           |
| $\mu$ (mm <sup>-1</sup> )     | 0.647                                           |
| $F(000)$                      | 576.0                                           |
| GOF on $F^2$                  | 1.119                                           |
| $R_1^a$ ( $I > 2\sigma(I)$ )  | 0.0490                                          |
| $wR_2^b$ ( $I > 2\sigma(I)$ ) | 0.1306                                          |

143  $^a R_1 = \sum ||F_o| - |F_c|| / \sum |F_o|$ .  $^b wR_2 = \{ \sum [w(F_o^2 - F_c^2)^2] / \sum [w(F_o^2)^2] \}^{1/2}$ .

144

145 **Table S5.** Geometrical coordinates of the compound showed in Figure S4 left.

|   |          |          |          |
|---|----------|----------|----------|
| O | 3.71346  | 0.74608  | -0.2713  |
| O | -4.12224 | 1.76363  | 0.56807  |
| H | -3.14468 | 1.64682  | 0.45548  |
| N | -1.83913 | 0.56832  | 0.04311  |
| C | 2.36707  | 0.61441  | -0.15806 |
| C | -3.96239 | -0.53897 | -0.11989 |
| C | 1.61019  | 1.72769  | -0.54568 |
| H | 2.13557  | 2.60681  | -0.90231 |
| C | -0.43027 | 0.54491  | -0.01263 |
| C | -4.70587 | 0.59986  | 0.27061  |
| C | 0.23139  | 1.69598  | -0.46082 |
| H | -0.36145 | 2.55642  | -0.75357 |
| C | 1.72131  | -0.52505 | 0.32302  |
| H | 2.28466  | -1.38751 | 0.65734  |
| C | -4.6404  | -1.72917 | -0.4227  |
| H | -4.0559  | -2.59583 | -0.72248 |
| C | 0.32975  | -0.55155 | 0.39337  |
| H | -0.16426 | -1.42675 | 0.80458  |
| C | -6.10149 | 0.51133  | 0.34912  |
| H | -6.65125 | 1.39603  | 0.65034  |
| C | 4.5237   | -0.34618 | 0.12472  |
| H | 4.26497  | -1.23919 | -0.46348 |
| H | 4.34703  | -0.57964 | 1.18526  |
| C | -2.51164 | -0.4944  | -0.21313 |
| H | -2.01037 | -1.41962 | -0.52847 |
| C | 5.97196  | 0.03991  | -0.10169 |
| H | 6.18902  | 0.94629  | 0.47519  |
| H | 6.10677  | 0.29558  | -1.15901 |
| C | -6.01861 | -1.81115 | -0.34342 |
| H | -6.53062 | -2.73699 | -0.57881 |
| C | -6.74279 | -0.6781  | 0.04607  |
| H | -7.82535 | -0.72821 | 0.11266  |
| C | 6.93166  | -1.07952 | 0.29566  |
| H | 6.77532  | -1.33616 | 1.35088  |
| H | 6.69596  | -1.98326 | -0.28009 |
| C | 8.3915   | -0.69544 | 0.07228  |
| H | 8.65539  | 0.18994  | 0.65841  |
| H | 8.57644  | -0.46371 | -0.98093 |
| H | 9.06652  | -1.50431 | 0.36217  |

147 **Table S6.** Geometrical coordinates of the compound showed in Figure S4 right.

|   |          |          |          |   |          |         |          |
|---|----------|----------|----------|---|----------|---------|----------|
| O | -2.63471 | -3.16768 | 0.23242  | O | -4.68050 | 1.54203 | 0.55709  |
| O | 5.27336  | -2.51128 | 0.54823  | O | 2.99569  | 0.38409 | 1.88329  |
| H | 4.28847  | -2.61561 | 0.49091  | H | 2.03532  | 0.59150 | 1.76931  |
| N | 2.80870  | -2.12462 | -0.28068 | N | 0.85980  | 1.67135 | 1.04581  |
| C | -1.32476 | -2.83294 | 0.09295  | C | -0.53502 | 1.71354 | 0.86144  |
| C | 4.68476  | -0.89576 | -1.13617 | C | 3.08840  | 2.36705 | 0.51165  |
| C | -0.40082 | -3.87908 | 0.20871  | C | -2.52366 | 1.92672 | -0.51669 |
| H | -0.77556 | -4.87856 | 0.40054  | H | -2.95934 | 2.11160 | -1.49091 |
| C | 1.41854  | -2.33096 | -0.17123 | C | -1.13664 | 1.98073 | -0.36820 |
| C | 5.63026  | -1.56808 | -0.32672 | H | -0.51887 | 2.18551 | -1.23806 |
| C | 0.95439  | -3.62659 | 0.09181  | C | -3.32434 | 1.61271 | 0.58309  |
| H | 1.67809  | -4.42922 | 0.19049  | C | 3.70000  | 1.32988 | 1.25600  |
| C | -0.87345 | -1.53331 | -0.13676 | C | 1.64295  | 2.47262 | 0.41693  |
| H | -1.56357 | -0.69973 | -0.19459 | H | 1.24347  | 3.27686 | -0.2171  |
| C | 5.12233  | 0.10656  | -2.01200 | C | -2.72397 | 1.32933 | 1.81797  |
| H | 4.38091  | 0.63056  | -2.61083 | H | -3.36514 | 1.07183 | 2.65423  |
| C | 0.49127  | -1.29412 | -0.26916 | C | -1.34900 | 1.36359 | 1.94836  |
| H | 0.83798  | -0.27559 | -0.40533 | H | -0.87514 | 1.12161 | 2.89391  |
| C | 6.98500  | -1.22992 | -0.43305 | C | -5.33863 | 1.77491 | -0.67719 |
| H | 7.69280  | -1.76155 | 0.19345  | H | -5.05829 | 0.99105 | -1.39841 |
| C | -3.58320 | -2.11891 | 0.15233  | H | -5.02649 | 2.74275 | -1.09487 |
| H | -3.50284 | -1.61088 | -0.82197 | C | 5.09834  | 1.27421 | 1.33492  |
| H | -3.38344 | -1.36705 | 0.93051  | H | 5.54231  | 0.46127 | 1.89930  |
| C | 3.26551  | -1.20272 | -1.04695 | C | 5.27738  | 3.24648 | -0.06527 |
| H | 2.59776  | -0.60442 | -1.68185 | H | 5.89272  | 3.97847 | -0.57585 |
| C | -4.96724 | -2.71066 | 0.32513  | C | 3.90051  | 3.31069 | -0.14204 |
| H | -5.02744 | -3.19764 | 1.30537  | H | 3.41782  | 4.10288 | -0.70997 |
| H | -5.11950 | -3.49066 | -0.42967 | C | -6.83402 | 1.77027 | -0.42421 |
| C | 6.46200  | 0.43888  | -2.11243 | H | -7.08917 | 2.62468 | 0.21314  |
| H | 6.78648  | 1.21948  | -2.79126 | H | -7.09571 | 0.86695 | 0.13774  |
| C | 7.38985  | -0.24179 | -1.31672 | C | 5.86952  | 2.21669 | 0.68072  |
| H | 8.44489  | 0.00655  | -1.38688 | H | 6.95128  | 2.14580 | 0.73890  |
| C | -6.04190 | -1.63364 | 0.20416  | C | -7.63423 | 1.81906 | -1.72363 |
| H | -5.82759 | -0.83035 | 0.92074  | H | -7.34067 | 2.70145 | -2.30613 |
| H | -5.98051 | -1.17499 | -0.79318 | H | -7.37867 | 0.94468 | -2.33582 |
| C | -7.45052 | -2.17558 | 0.42652  | C | -9.13894 | 1.84614 | -1.47177 |
| H | -7.55023 | -2.60581 | 1.42744  | H | -9.45472 | 0.96011 | -0.91209 |
| H | -7.68531 | -2.96101 | -0.29837 | H | -9.70093 | 1.86982 | -2.40831 |
| H | -8.20425 | -1.38910 | 0.32316  | H | -9.42109 | 2.72648 | -0.88670 |
